# Supplementary material for: Thrusts control the thermal maturity of accreted sediments
Source: Copernicus journal article supplement (doi:10.5194/se-15-1-2024), 2024-01-08

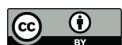

## *Supplement of*

# **Thrusts control the thermal maturity of accreted sediments**

**Utsav Mannu et al.**

*Correspondence to:* Utsav Mannu ([utsav.mannu@iitgn.ac.in](mailto:utsav.mannu@iitgn.ac.in))

The copyright of individual parts of the supplement might differ from the article licence.

1    **Supplementary Figures**

2    **Fig. S1:**

3    *Typical Distribution of thermal conductivity in wedge*

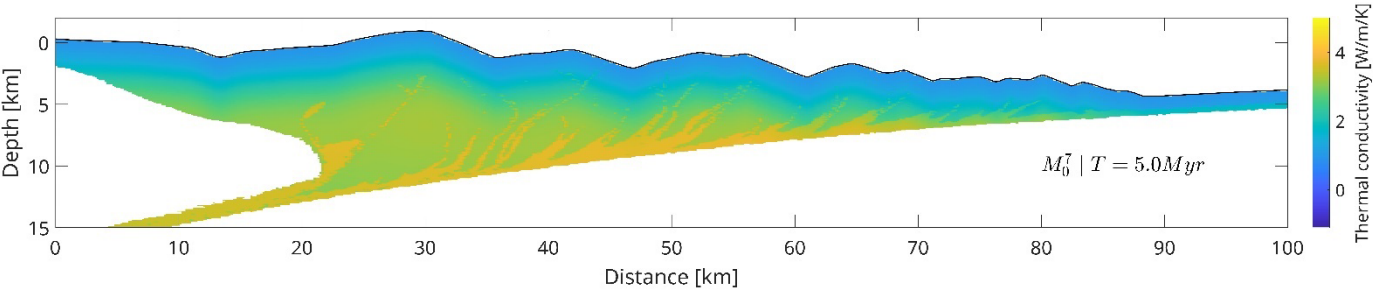

19 Fig. S2:

20 Scheme of trench sedimentation in models (taken from (Mannu et al., 2017))

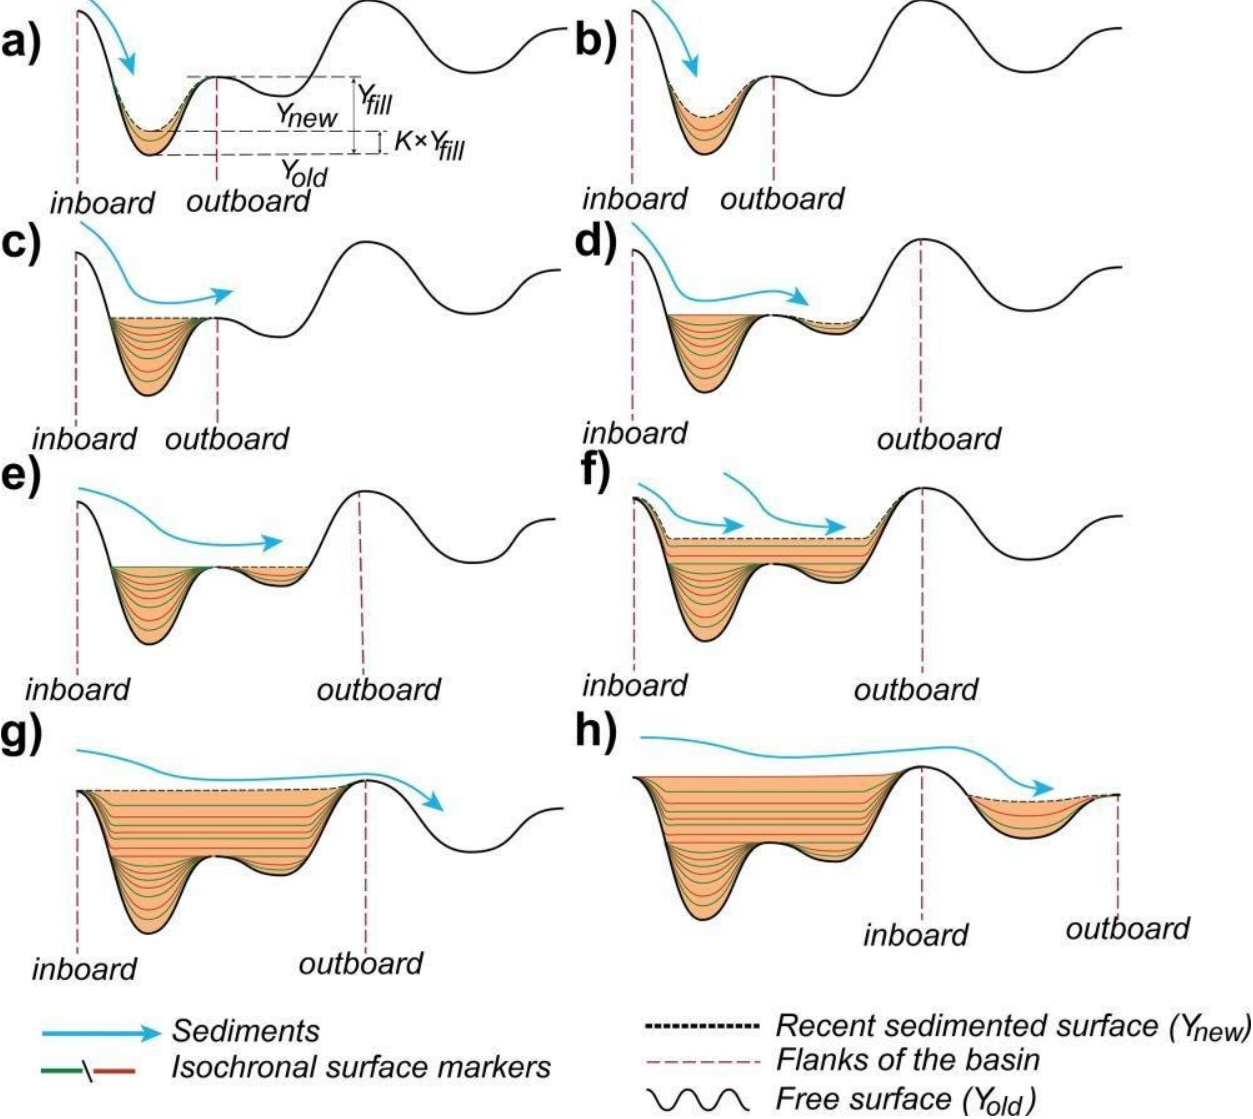

27 **Fig. S3:**

28 *Plot of Temperature vs Depth profile in for water-sediment interaction using the data from the International Argo Program*  
29 *and the national programs that contribute for the location(represented by the white square) given in the inset The magenta*  
30 *circle **represents** the Temperature vs Depth profile from the data while the black line is the fitted thermocline used in our*  
31 *models for water-sediment thermal interaction.*

32

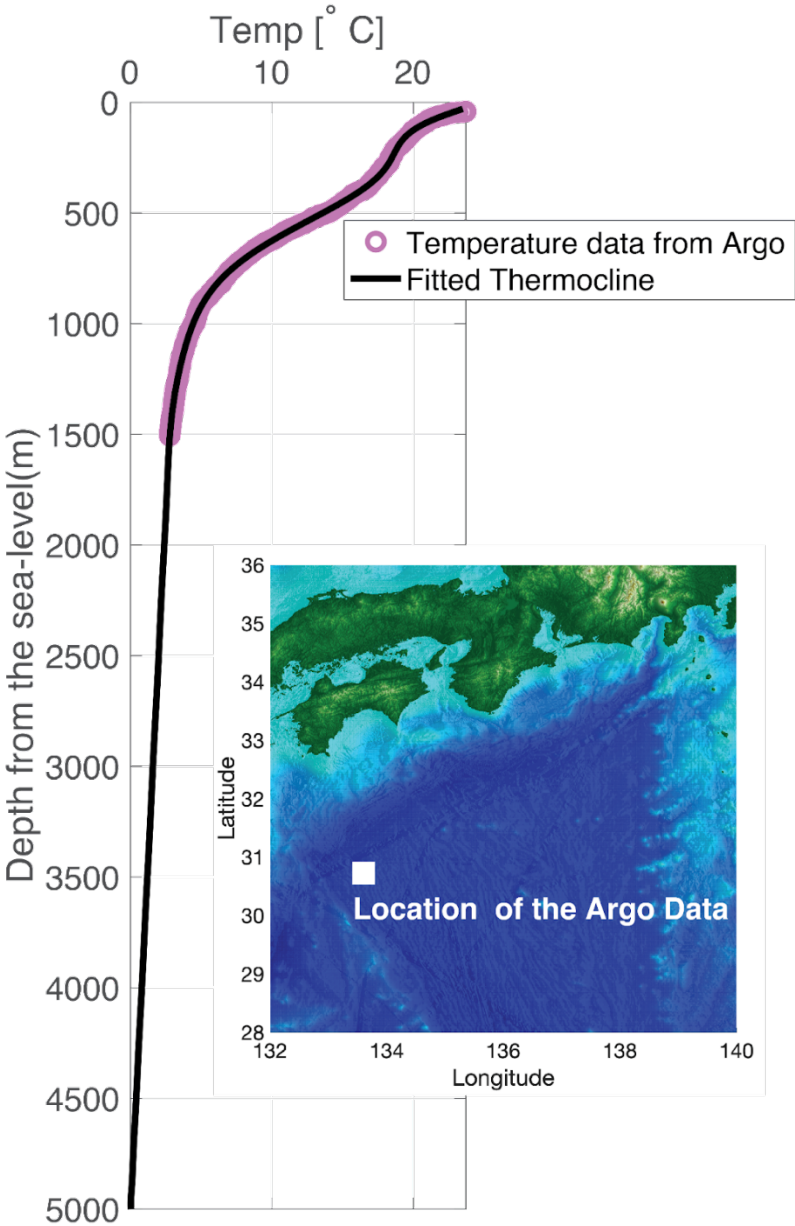

33

34 **Fig. S4:**  
 35 Typical thermomechanical evolution of the accretionary wedge for model  $M_0^{4.5}$  at 0.5 Myr, 2.5 Myr, 5.0 Myr and 7.5 Myr of  
 36 lithological evolution (Panel A-D). The dashed white lines represent the contours of the temperature field. The colormap for  
 37 the first 4 panels is same as Figure 1. The last panel represents thermal maturity values at ~7.5 Myr computed using Easy%Ro.  
 38 The colormap for Panel E is same as that of Figure 3.  
 39

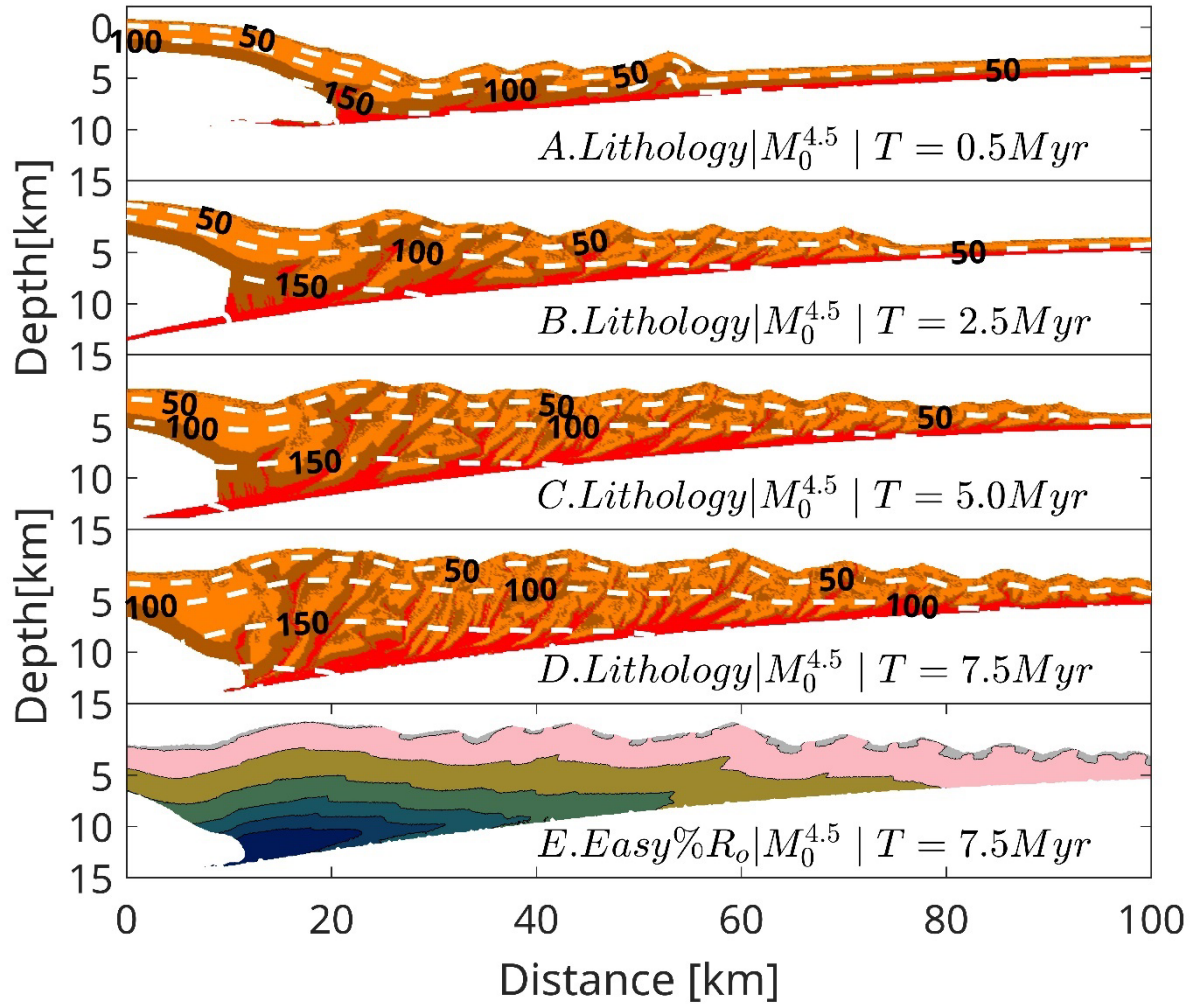

45 **Fig. S5:**  
 46 Typical thermomechanical evolution of the accretionary wedge for model  $M_0^7$  at 0.5 Myr, 2.5 Myr, 5.0 Myr and 7.5 Myr of  
 47 lithological evolution (Panel A-D). The dashed white lines represent the contours of the temperature field. The colormap for  
 48 the first 4 panels is same as Figure 1. The last panel represents thermal maturity values at  $\sim 7.5$  Myr computed using Easy%Ro.  
 49 The colormap for Panel E is same as that of Figure 3.  
 50

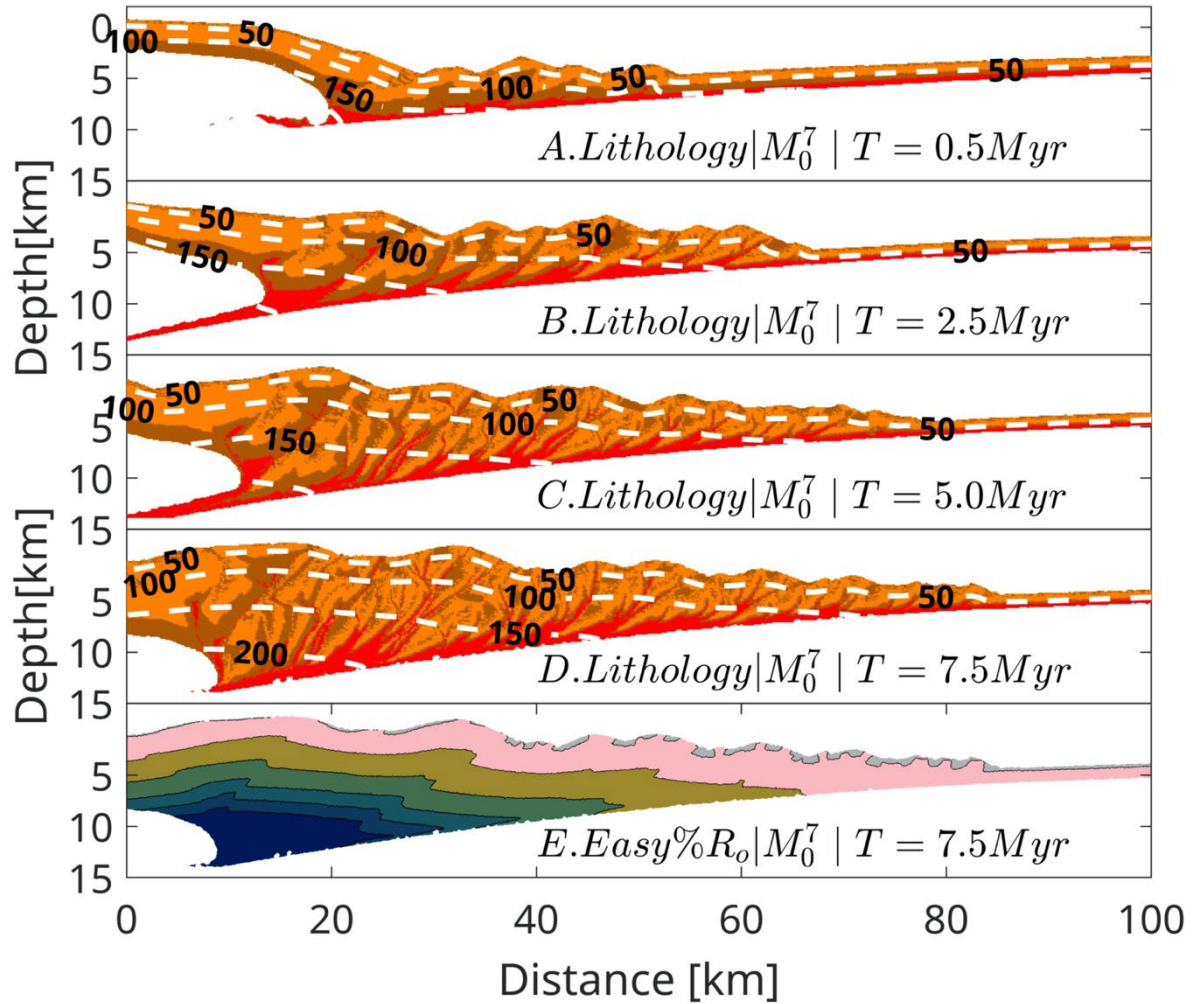

57 **Fig. S6:**  
 58 Typical thermomechanical evolution of the accretionary wedge for model  $M_0^{9.5}$  at 0.5 Myr, 2.5 Myr, 5.0 Myr and 7.5 Myr of  
 59 lithological evolution (Panel A-D). The dashed white lines represent the contours of the temperature field. The colormap for  
 60 the first 4 panels is same as Figure 1. The last panel represents thermal maturity values at ~7.5 Myr computed using Easy%Ro.  
 61 The colormap for Panel E is same as that of Figure 3.  
 62  
 63

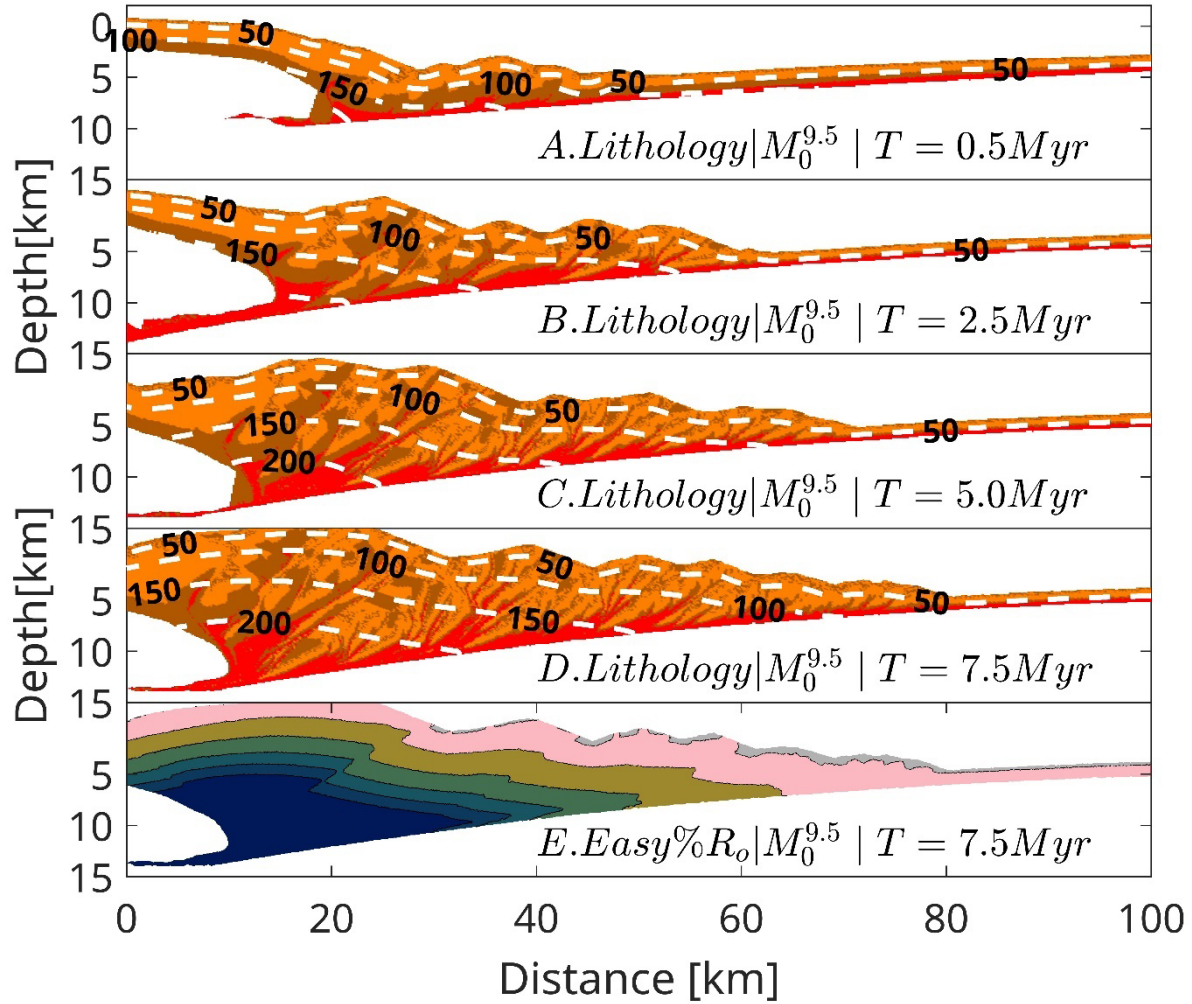

70 **Fig. S7:**  
71 Typical thermomechanical evolution of the accretionary wedge for model  $M_0^{12}$  at 0.5 Myr, 2.5 Myr, 5.0 Myr and 7.5 Myr of  
72 lithological evolution (Panel A-D). The dashed white lines represent the contours of the temperature field. The colormap for  
73 the first 4 panels is same as Figure 1. The last panel represents thermal maturity values at  $\sim 7.5$  Myr computed using Easy% $R_o$ .  
74 The colormap for Panel E is same as that of Figure 3.  
75  
76

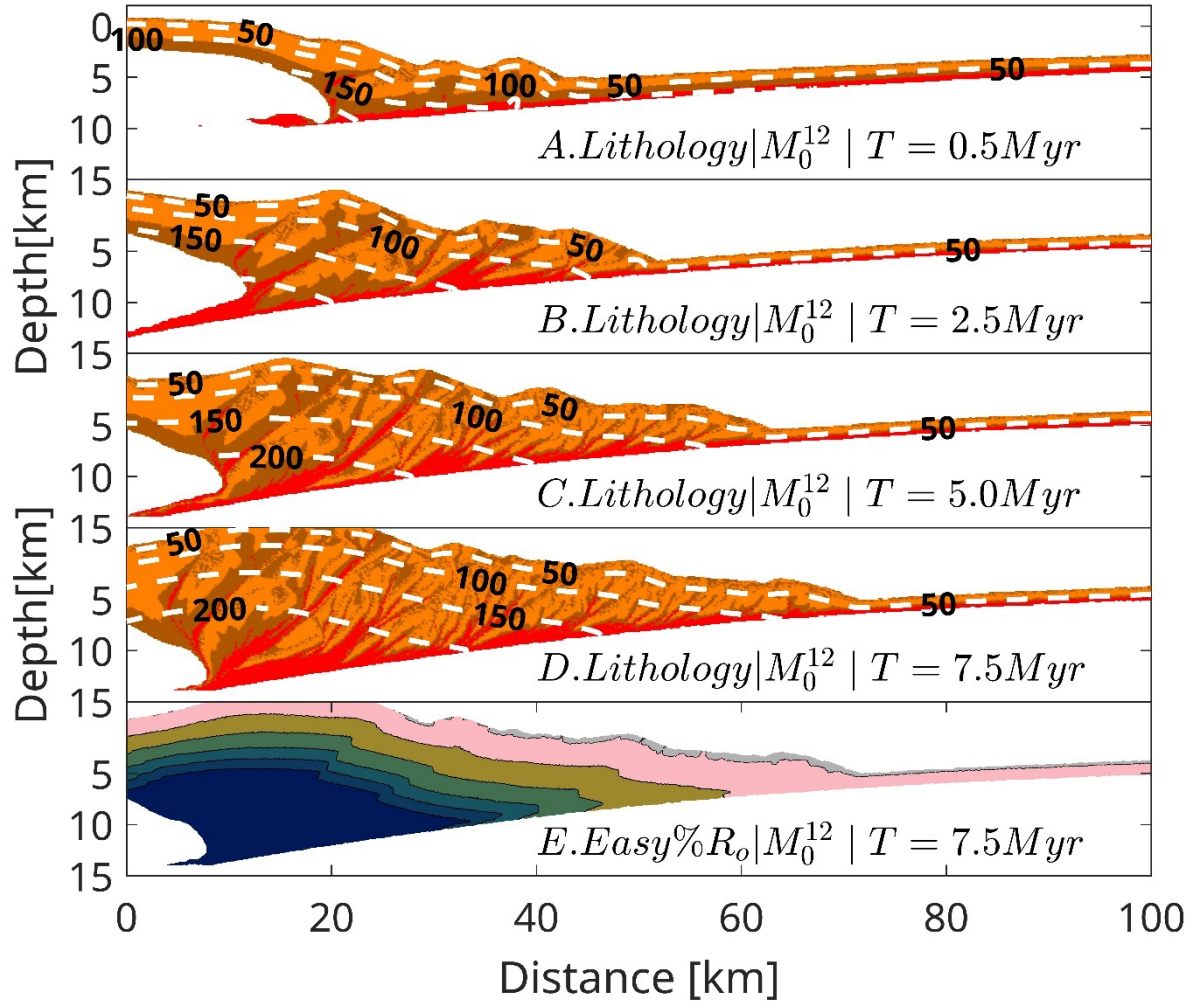

82 **Fig. S8:**  
83 Typical thermomechanical evolution of the accretionary wedge for model  $M_0^{14.5}$  at 0.5 Myr, 2.5 Myr, 5.0 Myr and 7.5 Myr of  
84 lithological evolution (Panel A-D). The dashed white lines represent the contours of the temperature field. The colormap for  
85 the first 4 panels is same as Figure 1. The last panel represents thermal maturity values at  $\sim 7.5$  Myr computed using Easy% $R_o$ .  
86 The colormap for Panel E is same as that of Figure 3.  
87

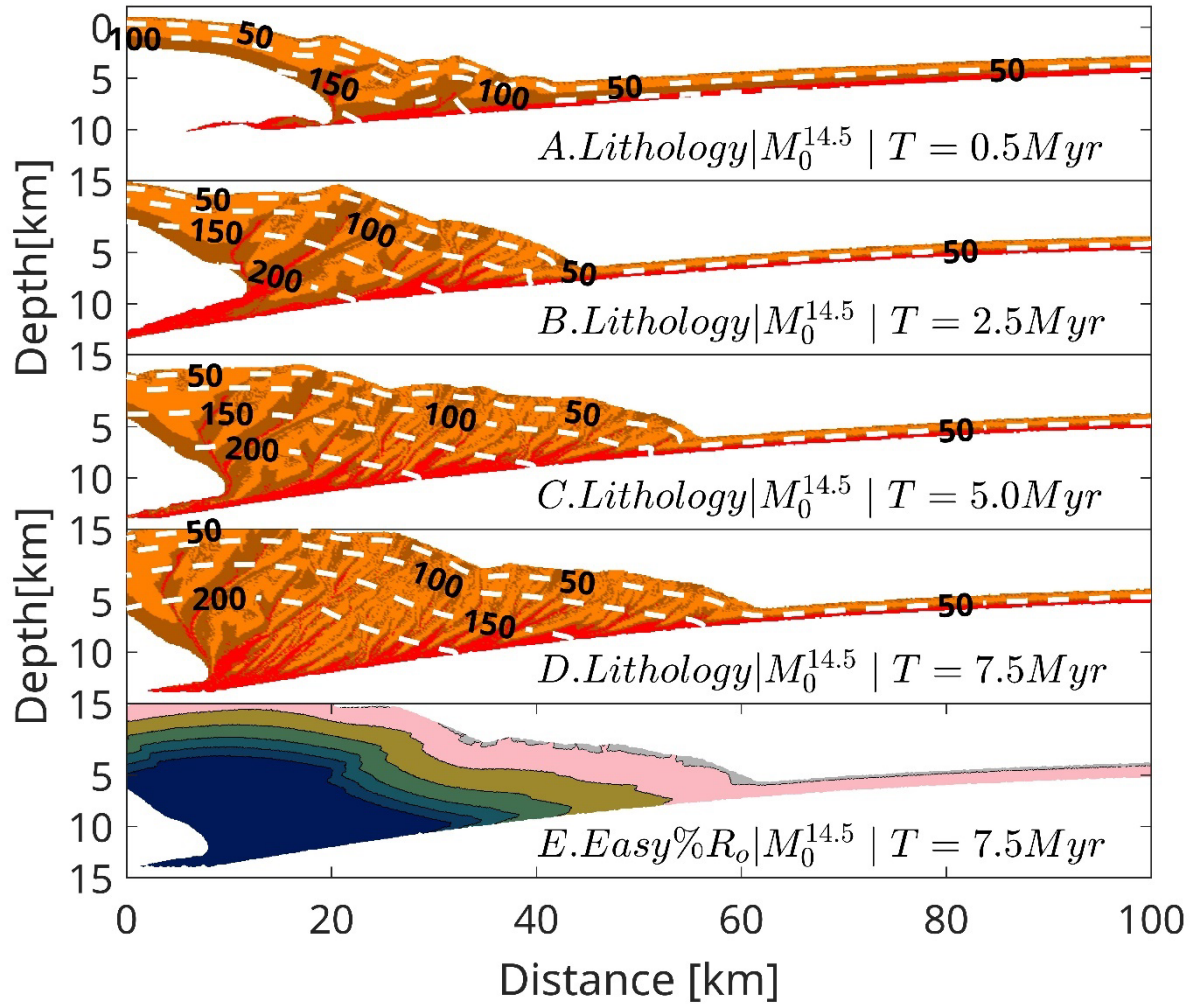

93 **Fig. S9:**  
 94 Typical thermomechanical evolution of the accretionary wedge for model  $\mathbf{M}_{0.1}^{9.5}$  at 5.0 Myr and 7.5 Myr of lithological evolution  
 95 (Panel A-B). The dashed white lines represent the contours of the temperature field. The colormap for the first 2 panels is  
 96 same as Figure 1. The Panel C represents thermal maturity values at  $\sim 7.5$  Myr computed using Easy% $R_o$ . The colormap for  
 97 Panel E is same as that of Figure 3.  
 98  
 99

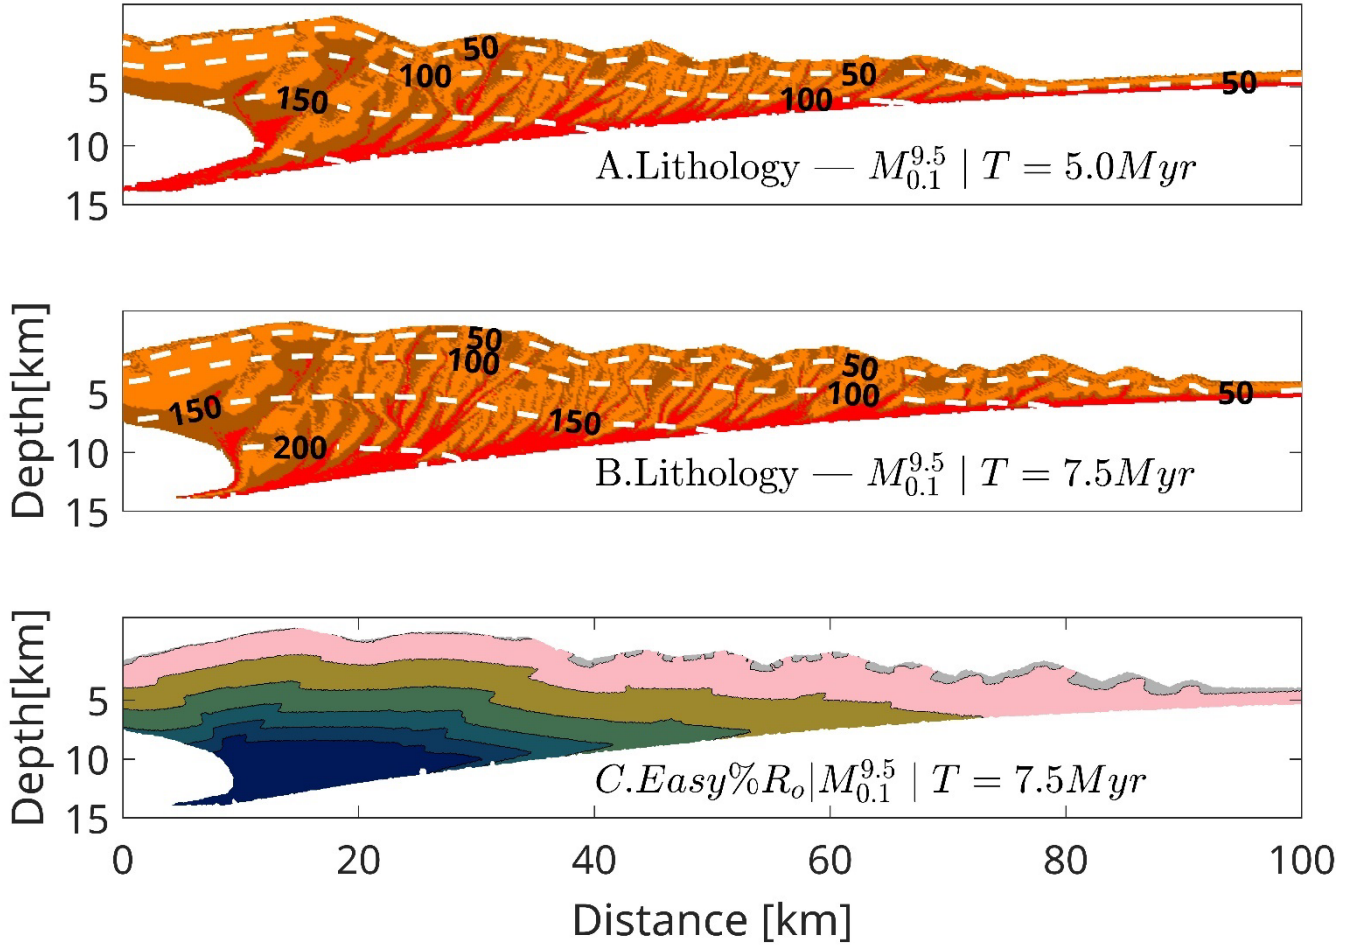

106

107 **Fig. S10:**

108 Typical thermomechanical evolution of the accretionary wedge for model  $M_{0.3}^{9.5}$  at 5.0 Myr and 7.5 Myr of lithological  
 109 evolution (Panel A-B). The dashed white lines represent the contours of the temperature field. The colormap for the first 2  
 110 panels is same as Figure 1. The Panel C represents thermal maturity values at ~7.5 Myr computed using Easy%Ro. The  
 111 colormap for Panel E is same as that of Figure 3.

112

113

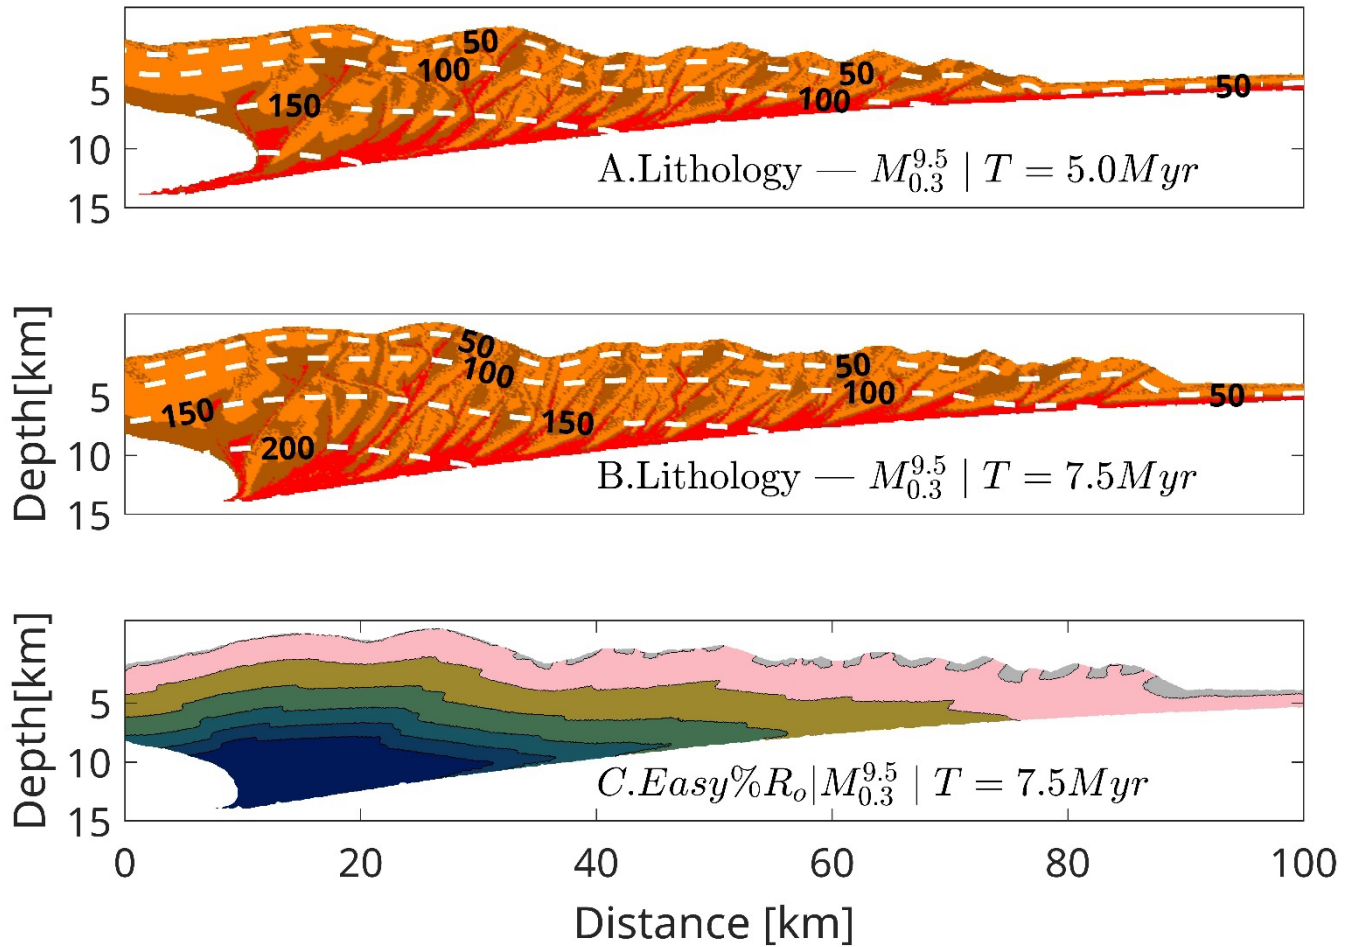

114

115

116

117

118

119

120 **Fig. S11:**

121 Typical thermomechanical evolution of the accretionary wedge for model  $M_{0.5}^{4.5}$  at 5.0 Myr and 7.5 Myr of lithological evolution  
 122 (Panel A-B). The dashed white lines represent the contours of the temperature field. The colormap for the first 2 panels is  
 123 same as Figure 1. The Panel C represents thermal maturity values at ~7.5 Myr computed using Easy% $R_o$ . The colormap for  
 124 Panel E is same as that of Figure 3.

125

126

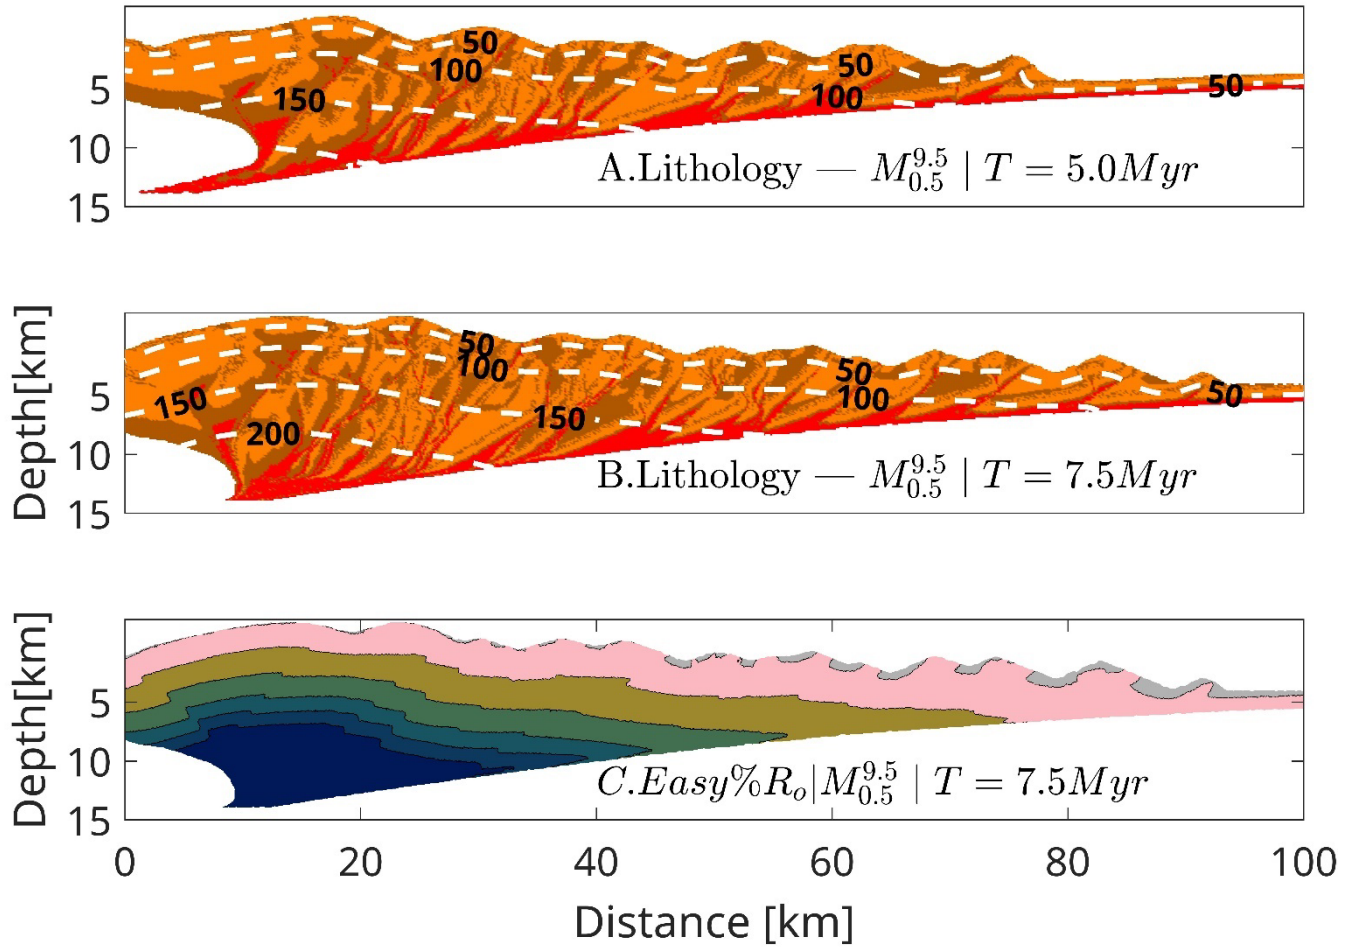

127

128

129

130

131

132 **Fig. S12:**  
 133 Typical thermomechanical evolution of the accretionary wedge for model  $\mathbf{M}_{0.7}^{9.5}$  at 5.0 Myr and 7.5 Myr of lithological evolution  
 134 (Panel A-B). The dashed white lines represent the contours of the temperature field. The colormap for the first 2 panels is  
 135 same as Figure 1. The Panel C represents thermal maturity values at  $\sim 7.5$  Myr computed using Easy% $R_o$ . The colormap for  
 136 Panel E is same as that of Figure 3.  
 137  
 138

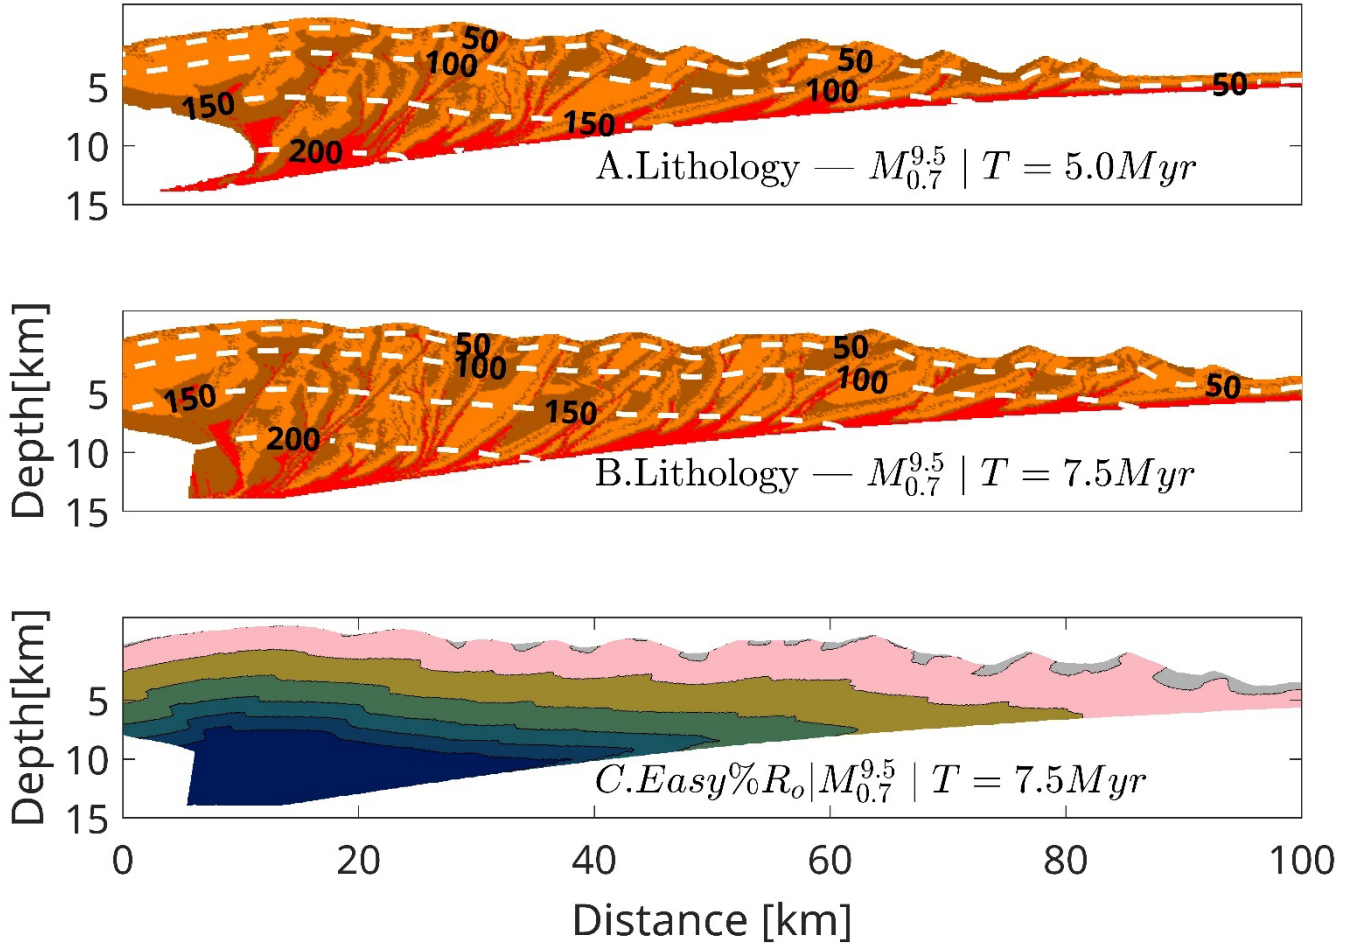

145

146

**Fig. S13:**

147

148

149

150

151

152

Typical thermomechanical evolution of the accretionary wedge for model  $M_{0.9}^{9.5}$  at 5.0 Myr and 7.5 Myr of lithological evolution (Panel A-B). The dashed white lines represent the contours of the temperature field. The colormap for the first 2 panels is same as Figure 1. The Panel C represents thermal maturity values at ~7.5 Myr computed using Easy% $R_o$ . The colormap for Panel E is same as that of Figure 3.

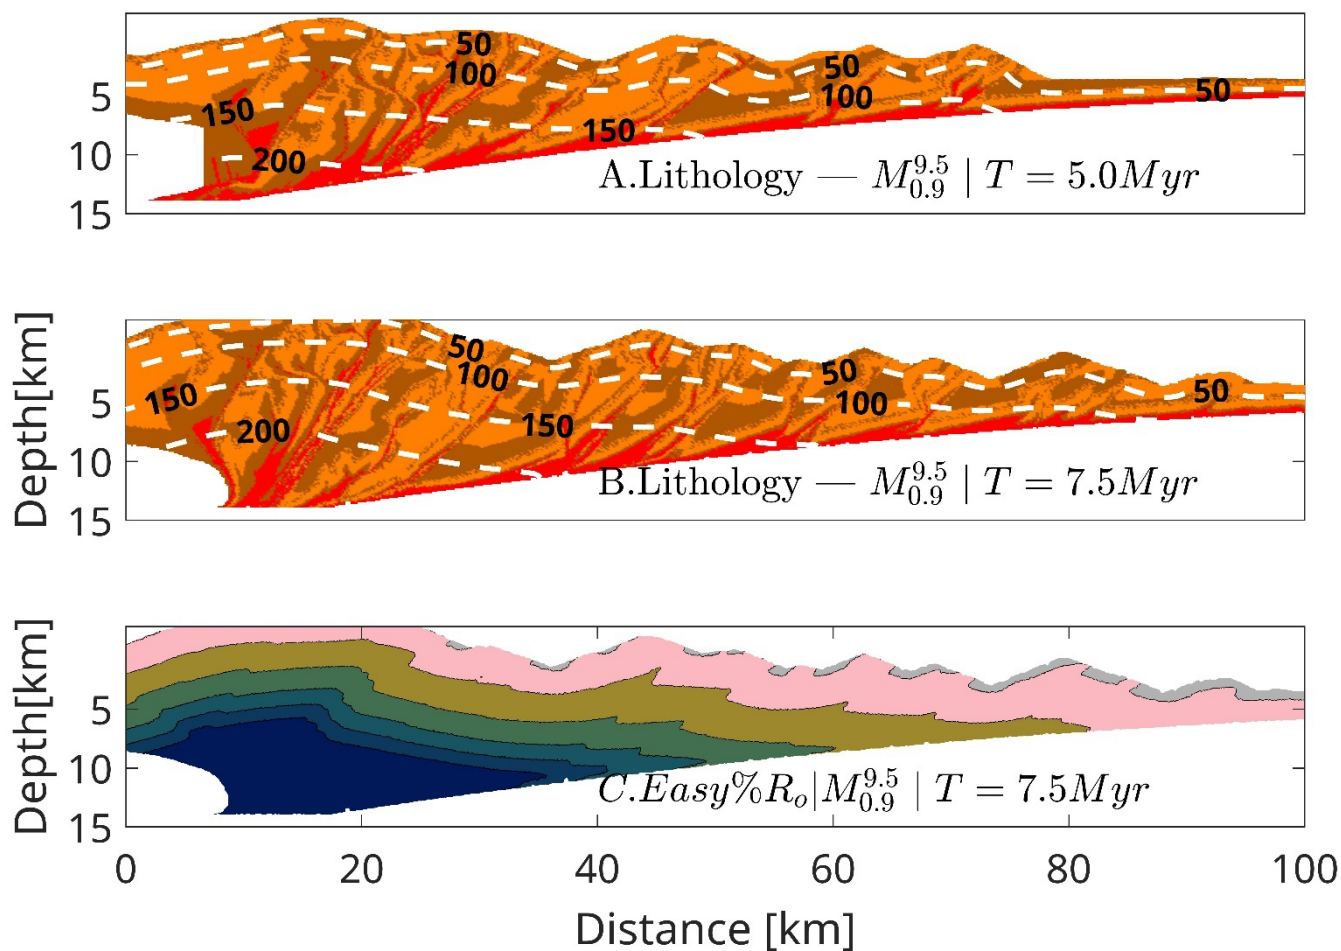

153

154

155

156

157

158  
159  
160  
161  
162  
163  
164  
165  
166  
167  
168  
169  
170  
171  
172  
173  
174  
175  
176  
177

178 **Fig. S14:**  
 179 *Plot of Temperature vs Depth profile in all models compared to Temperature-depth profile based on in-situ temperature from*  
 180 *the long-term borehole monitoring system (indicated red patch is the range of temperature estimated by [\(Sugihara et al.,](#)*  
 181 *[2014\)](#)). The temperature vs depth profiles for the models are computed for 20 kms from the backstop as shown in the inset.*  
 182  
 183

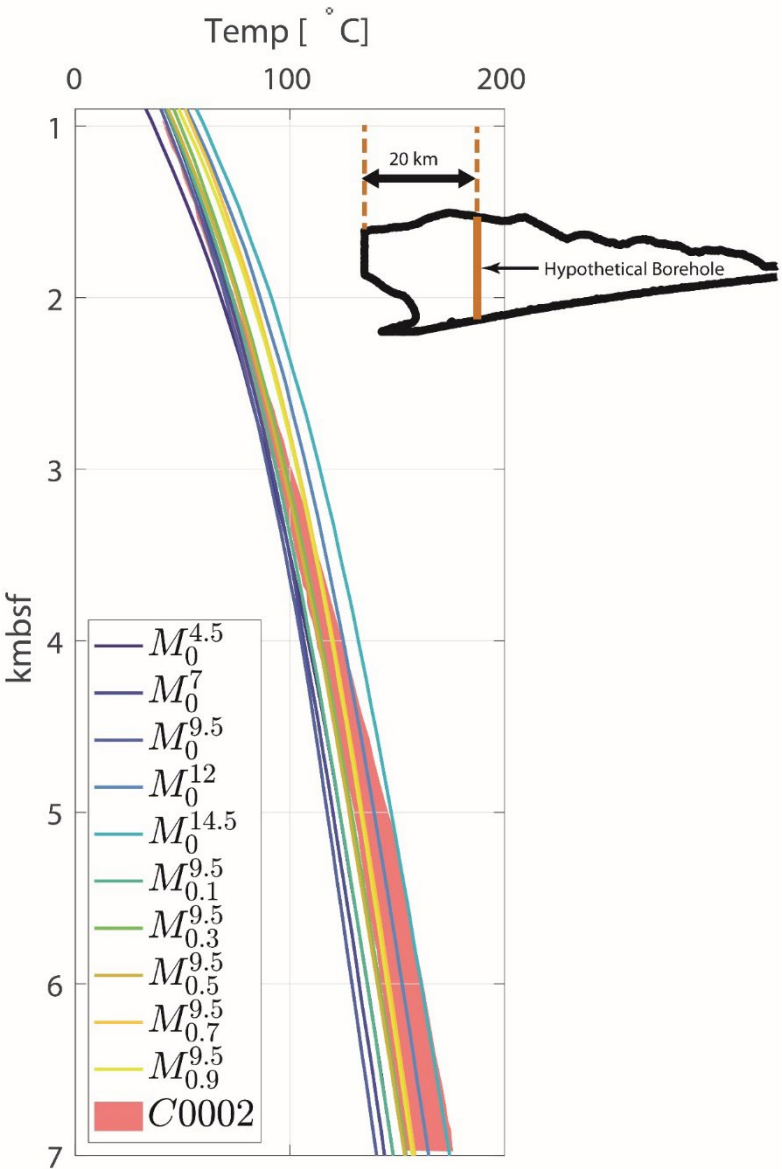

184

**Fig. S15**

*Trajectory of sediments in model. The wedge on top shows the location of individual boreholes relative to the position of the trench at 2.5 Myr. In each borehole, A-L 10 points are plotted for their trajectories between 2.5 Myr and 7.5 Myr. The color of markers in the trajectories represent the evolution of thermal maturity on individual sediment markers while undergoing evolution. The image of the wedge on top is a representative image showing the relative location of boreholes with respect to the trench and each other. We present 4 set of boreholes (each having 3 boreholes separated by a km), one of which lies in the wedge itself at 2.5 Myr and 3 lies in the incoming sediments as a distance of 1 km, 50km and 100 kms from trench.*

trench at 2.5 Myr. In each borehole, A-L 10 points are plotted for their trajectories between 2.5 Myr and 7.5 Myr. The color of markers in the trajectories represent the evolution of thermal maturity on individual sediment markers while undergoing evolution. The image of the wedge on top is a representative image showing the relative location of boreholes with respect to the trench and each other. We present 4 set of boreholes (each having 3 boreholes separated by a km), one of which lies in the wedge itself at 2.5 Myr and 3 lies in the incoming sediments as a distance of 1 km, 50km and 100 kms from trench.

of markers in the trajectories represent the evolution of thermal maturity on individual sediment markers while undergoing evolution. The image of the wedge on top is a representative image showing the relative location of boreholes with respect to the trench and each other. We present 4 set of boreholes (each having 3 boreholes separated by a km), one of which lies in the wedge itself at 2.5 Myr and 3 lies in the incoming sediments as a distance of 1 km, 50km and 100 kms from trench.

evolution. The image of the wedge on top is a representative image showing the relative location of boreholes with respect to the trench and each other. We present 4 set of boreholes (each having 3 boreholes separated by a km), one of which lies in the wedge itself at 2.5 Myr and 3 lies in the incoming sediments as a distance of 1 km, 50km and 100 kms from trench.

*the trench and each other. We present 4 set of boreholes (each having 3 boreholes separated by a km), one of which lies in the wedge itself at 2.5 Myr and 3 lies in the incoming sediments as a distance of 1 km, 50km and 100 kms from trench.*

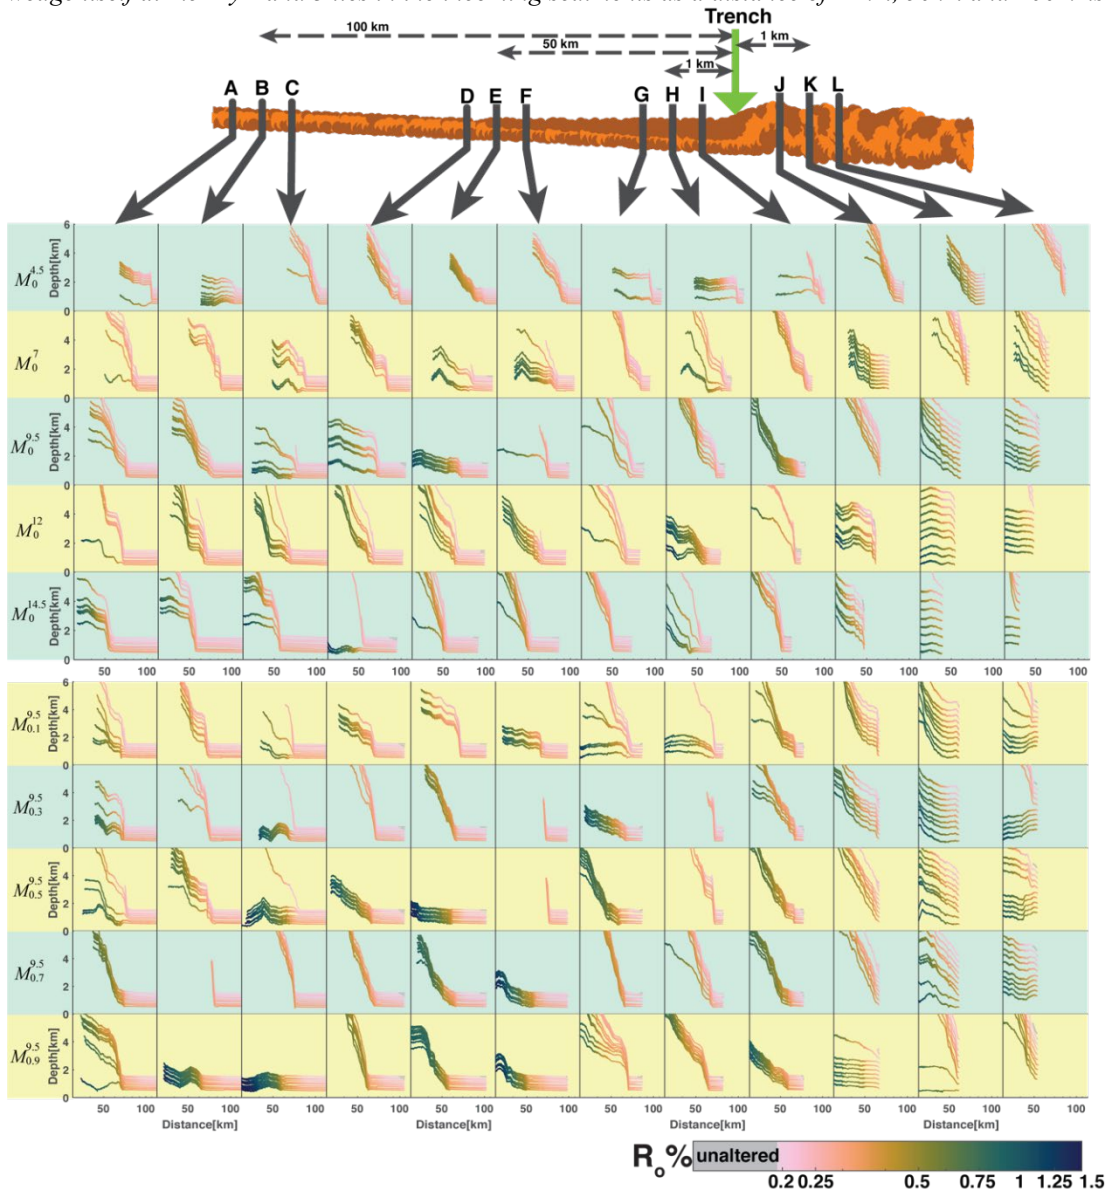

195 *Vitrinite Reflectance(%R<sub>v</sub>) vs Maximum Exposure temperature in models. Panel A, B and C show the Temperatures as a*  
 196 *function of %R<sub>v</sub> computed from Easy%R<sub>v</sub>, Simple%R<sub>v</sub>, Basin%R<sub>v</sub> for models  $M_0^{4.5} - M_0^{14.5}$ . Similarly panels D, E and F show*  
 197 *the Temperatures as a function of %R<sub>v</sub> computed from Easy%R<sub>v</sub>, Simple%R<sub>v</sub>, Basin%R<sub>v</sub> for models  $M_{0.1}^{9.5} - M_{0.9}^{9.5}$ .*  
 198

199

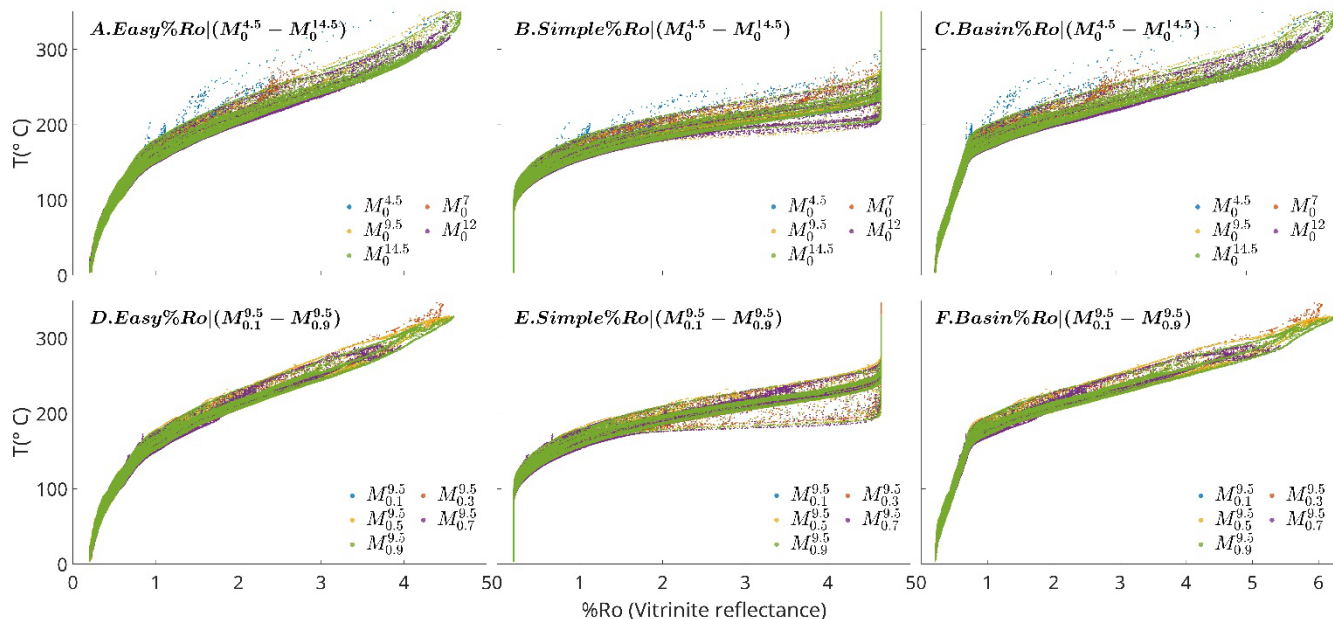

200

201

202

203

204

205

206

207

208

209

210

211

212 **Fig. S17:**  
 213 Panel A shows %Ro vs T for model (shown by smaller markers) and C0002 borehole (shown by large circular markers)  
 214 (Fukuchi et al., 2017).  $Y_n$  is the depth of the marker from the surface normalized by the thickness (vertical extent) of the wedge  
 215 at the location of the marker as illustrated in Panel B.  
 216

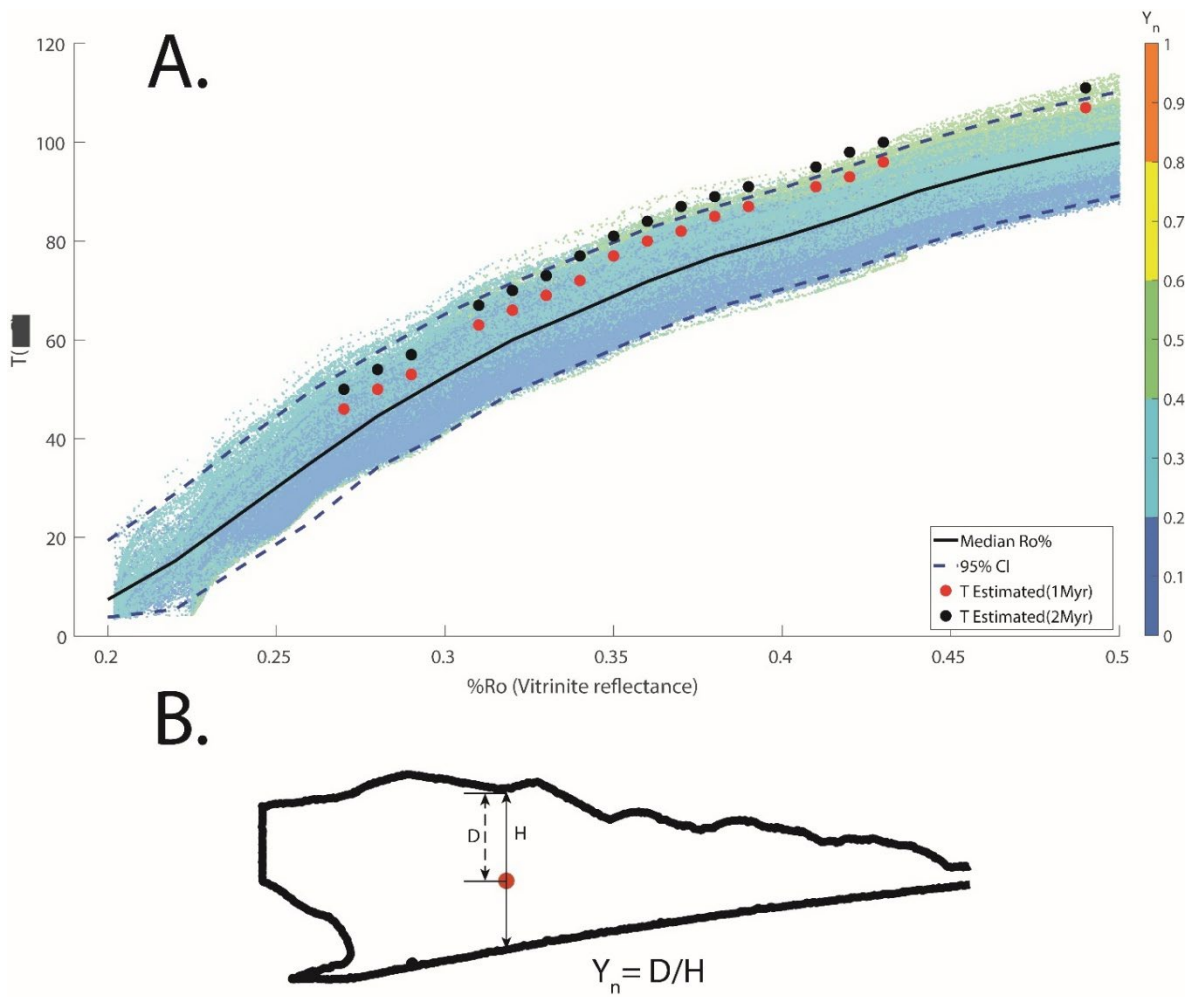

222 **Fig. S18:**

223 Illustration to show the measurement of L (length of wedge),  $\alpha$  (surface slope),  $\beta$  (basal dip and, D(Distance between the first  
224 and second frontal thrust).

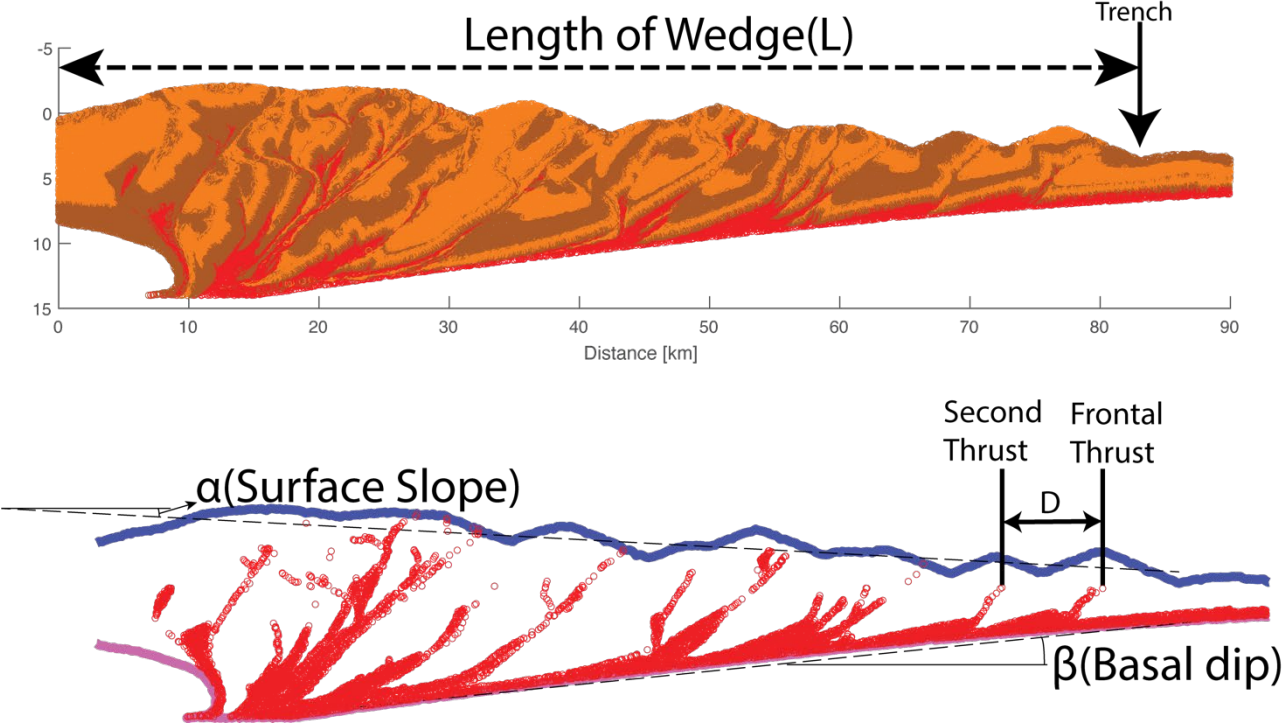

238 **Fig S19:**

239 Evolution of % $R_o$  for constant temperatures with time (computed using Simple % $R_o$ )

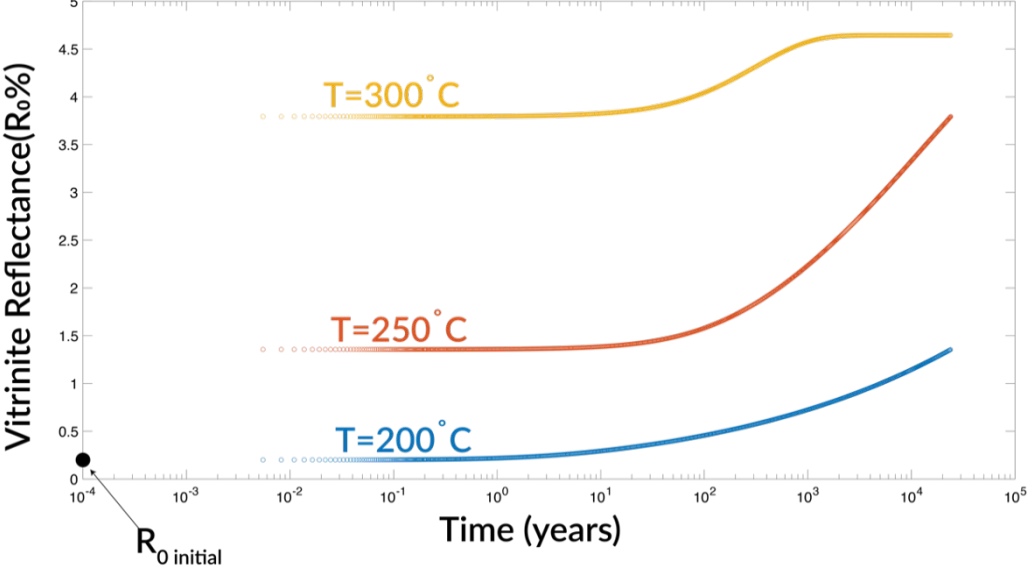

240 **Fig S20:**

242 Thermal maturity distribution in two models with different convergent velocity. Panel A and B shows a models with convergent  
243 velocity of 5 cm/yr and 7.5 cm/yr respectively. The colormap for the images is same as for Figure 3. The comparison between  
244 the models has been shown for different time to keep the volume of incoming sediments ( $T \cdot V_{conv}$ ) similar.

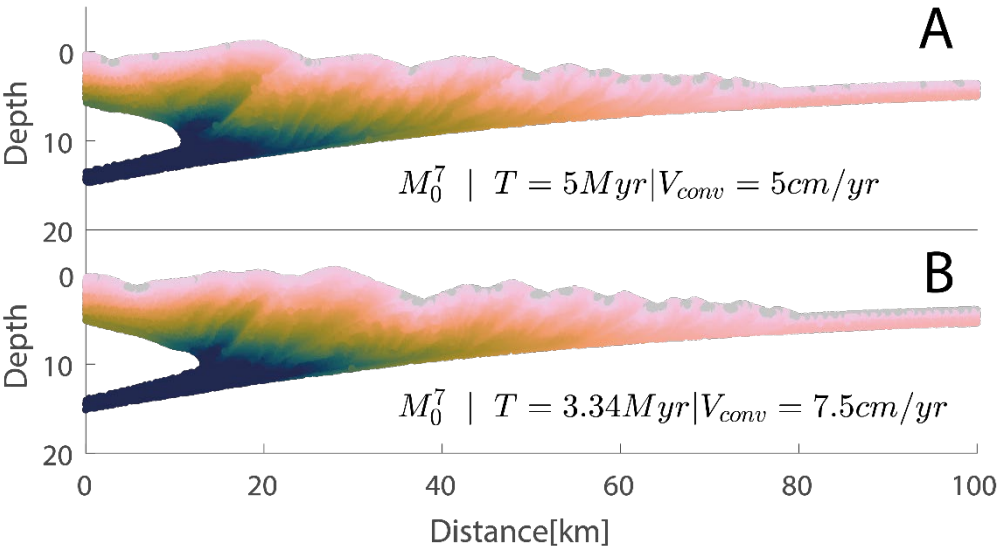

245  
246  
247

248  
249  
250  
251

**Fig S21:**  
*Distribution of viscosity in a representative model at 0.5 Myr, 2.5 Myr, 5.0 Myr and 7.5 Myr.*

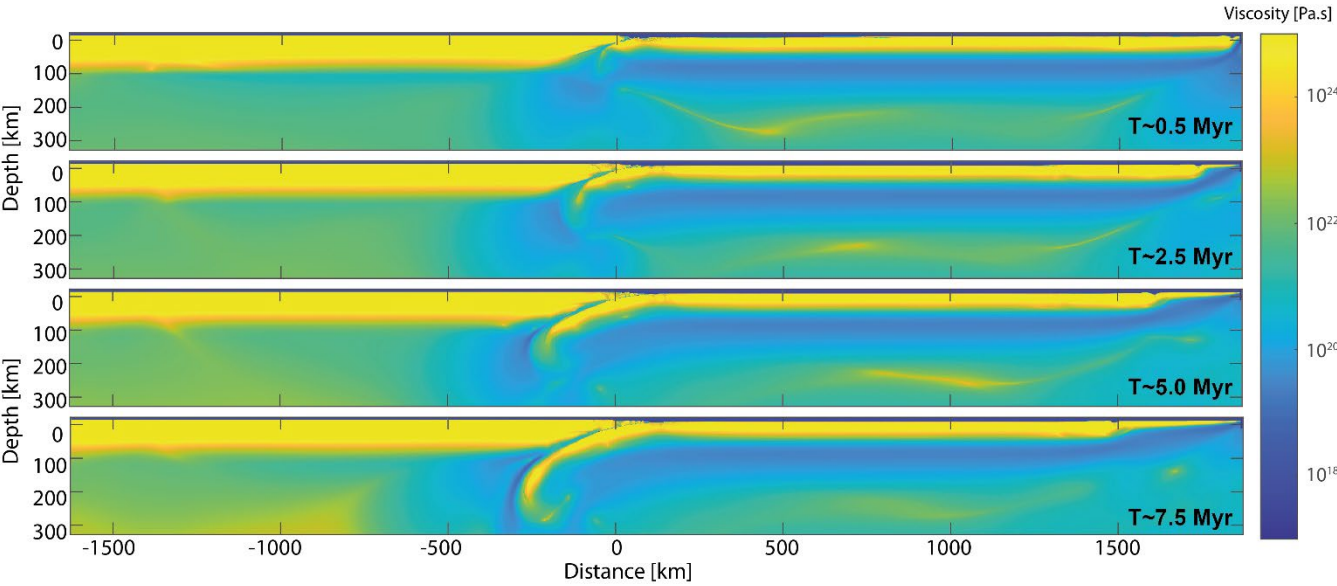

Supplement: Supplementary file 1 [file se-15-1-2024-supplement.pdf]
